# Supplementary material for: Selective bromination of 2,5-bis(2-thienyl)pyrroles and solid-state polymerization through the β-carbon of pyrrole
Source: Royal Society of Chemistry journal article supplement (doi:10.1039/c4ra01993h), 2014-01-01
Supplement: c4ra01993h1.pdf [file c4ra01993h1.pdf]

## SUPPORTING INFORMATION

### Selective Bromination of 2,5-Bis(2-thienyl)pyrroles and Solid-State Polymerization Through $\beta$ -Carbon of Pyrrole

Palas Baran Pati\* and Sanjio S. Zade\*

*Department of Chemical Sciences, Indian Institute of Science Education and Research, Kolkata, PO: BCKV campus main office, Mohanpur 741252, Nadia, West Bengal, India.*

[\*] email: palasbaranpati@iiserkol.ac.in; sanjiozade@iiserkol.ac.in

#### Table of contents

| Sr No. | Description                                                                                                                                                                               | Page No. |
|--------|-------------------------------------------------------------------------------------------------------------------------------------------------------------------------------------------|----------|
| 1      | <b>Fig. S1.</b> DFT calculation of the reaction pathway of bromination of <b>1</b> in acetic acid and DMF (values given in parenthesis) solvents with the Polarized Continuum Model (PCM) | S2       |
| 2      | <b>Fig. S2.</b> FT-IR spectra of doped <b>P2</b> prepared by solid-state polymerization                                                                                                   | S2       |
| 3      | <b>Fig. S3.</b> DSC curves of <b>2</b> as a function of scan rates                                                                                                                        | S3       |
| 4      | <b>Fig. S4.</b> Br...Br short contact in the crystal packing diagram of compound <b>2</b> .                                                                                               | S3       |
| 5      | <b>Table S1.</b> Crystallographic data and structure refinement parameters of compound <b>2</b> .                                                                                         | S4       |
| 6      | <b>Table S2.</b> Calculated absolute energies at B3LYP/6-31G(d)                                                                                                                           | S4       |
| 7      | <b>Fig. S5.</b> <sup>1</sup> H NMR spectra of <b>1</b>                                                                                                                                    | S5       |
| 8      | <b>Fig. S6.</b> <sup>13</sup> C NMR spectra of <b>1</b>                                                                                                                                   | S5       |
| 9      | <b>Fig. S7.</b> <sup>1</sup> H NMR spectra of <b>3</b>                                                                                                                                    | S6       |
| 10     | <b>Fig. S8.</b> <sup>13</sup> C NMR spectra of <b>3</b>                                                                                                                                   | S6       |
| 11     | <b>Fig. S9.</b> <sup>1</sup> H NMR spectra of <b>2</b>                                                                                                                                    | S7       |
| 12     | <b>Fig. S10.</b> <sup>13</sup> C NMR spectra of <b>2</b>                                                                                                                                  | S7       |
| 13     | <b>Fig. S11.</b> <sup>1</sup> H NMR spectra of <b>4</b>                                                                                                                                   | S8       |
| 14     | <b>Fig. S12.</b> <sup>13</sup> C NMR spectra of <b>4</b>                                                                                                                                  | S8       |
| 15     | <b>Fig. S13.</b> <sup>1</sup> H NMR spectra of <b>5</b>                                                                                                                                   | S9       |
| 16     | <b>Fig. S14.</b> <sup>1</sup> H NMR spectra of <b>6</b>                                                                                                                                   | S9       |
| 17     | <b>Fig. S14.</b> <sup>1</sup> H NMR spectra of <b>6</b>                                                                                                                                   | S10      |
| 18     | Coordinates of optimized structures                                                                                                                                                       | S10-S16  |

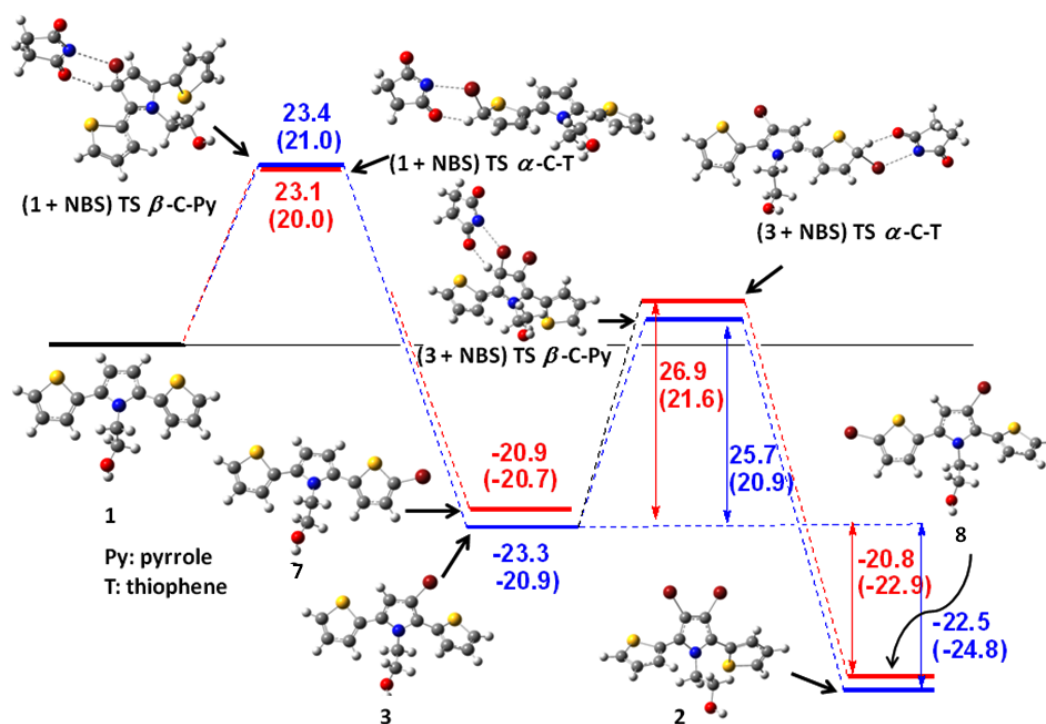

**Fig. S1.** DFT calculation of the reaction pathway of bromination of **1** in acetic acid and DMF (values given in parenthesis) solvents with the Polarized Continuum Model (PCM), using B3LYP/6-31G(d) level (single-point calculations). The gas phase optimized geometries are used for PCM calculation. Energy values are given in kcal/mole including ZPVE.

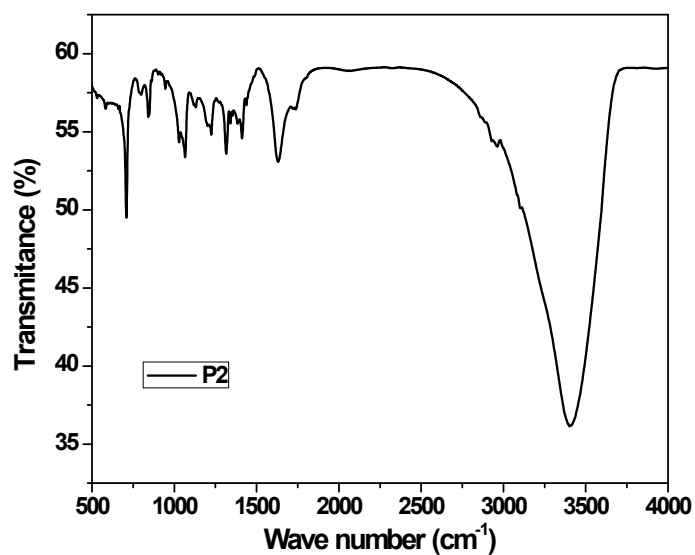

**Fig. S2.** FT-IR spectra of doped **P2** prepared by solid-state polymerization

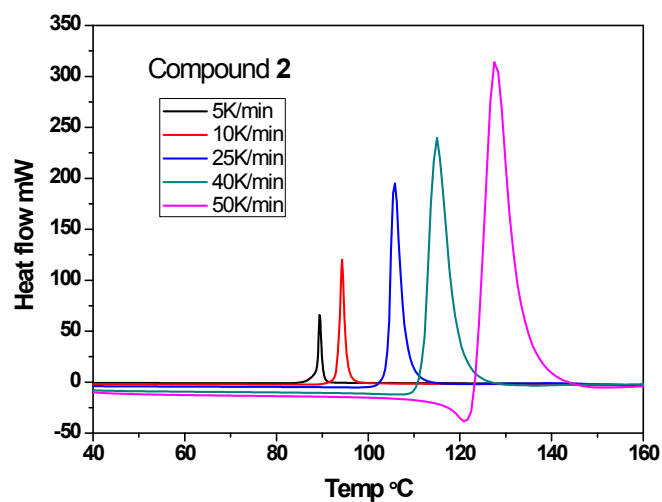

**Fig. S3.** DSC curves of **2** as a function of scan rates

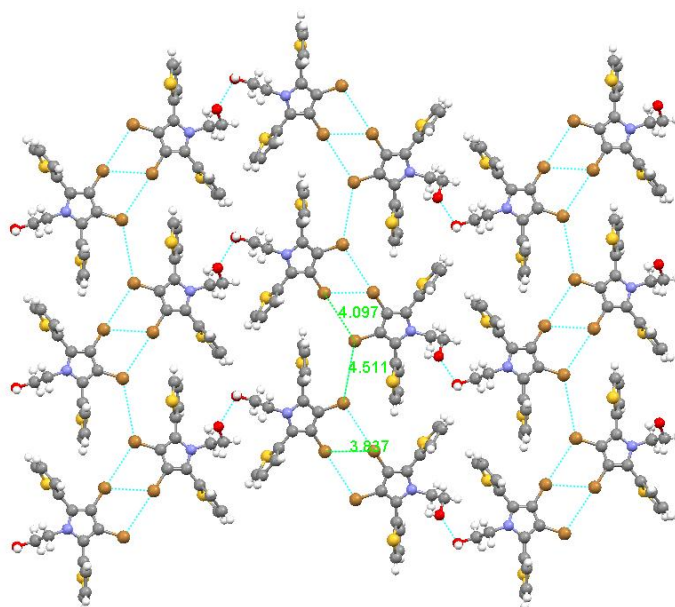

**Fig. S4.** Br...Br short contact in the crystal packing diagram of compound **2**.

**Table S1** Crystallographic data and structure refinement parameters of compound **2**.

|                       |                                                                                              |                     |                                              |
|-----------------------|----------------------------------------------------------------------------------------------|---------------------|----------------------------------------------|
| <b>Formula</b>        | C <sub>28</sub> H <sub>22</sub> N <sub>2</sub> O <sub>2</sub> S <sub>4</sub> Br <sub>4</sub> | <b>T [K]</b>        | 298(2)                                       |
| <b>Crystal System</b> | Monoclinic                                                                                   | <b>R1</b>           | 0.0591                                       |
| <b>Space group</b>    | <i>P</i> 2 <sub>1</sub> / <i>c</i>                                                           | <b>θ [°]</b>        | 2.43-22.44                                   |
| <b>a [Å]</b>          | 14.0099(11)                                                                                  | <b>index ranges</b> | -10 ≤ h ≤ 16<br>-13 ≤ k ≤ 13<br>-25 ≤ l ≤ 25 |
| <b>b [Å]</b>          | 10.9631(11)                                                                                  | <b>wR2</b>          | 0.1572                                       |

|                                            |            |                      |        |
|--------------------------------------------|------------|----------------------|--------|
| $c$ [Å]                                    | 21.397(2)  | $R_{\text{merge}}$   | 0.1037 |
| $\alpha$ [°]                               | 90         | <b>Parameters</b>    | 365    |
| $\beta$ [°]                                | 105.274(2) | <b>GOF</b>           | 1.026  |
| $\gamma$ [°]                               | 90         | <b>reflns total</b>  | 24363  |
| $V$ [Å <sup>3</sup> ]                      | 3170.3(5)  | <b>unique reflns</b> | 5623   |
| $Z$                                        | 4          | <b>obsd reflns</b>   | 3487   |
| $\lambda$ [Å]                              | 0.71073    | <b>CCDC No.</b>      | 935851 |
| $\rho_{\text{calcd}}$ [gcm <sup>-3</sup> ] | 1.813      |                      |        |
| $F[000]$                                   | 1692.7     |                      |        |
| $\mu$ [mm <sup>-1</sup> ]                  | 5.371      |                      |        |

**Table S2** Calculated absolute energies at B3LYP/6-31G(d)

| Compound                                              | E / a.u.     | ZPVE / a.u. | G <sup>0</sup> / a.u. | E / a.u. (AcOH) <sup>a</sup> | E / a.u. (DMF) <sup>a</sup> |
|-------------------------------------------------------|--------------|-------------|-----------------------|------------------------------|-----------------------------|
| <b>1</b>                                              | -1467.622303 | 0.239904    | -1467.428113          | -1467.630135                 | -1467.632336                |
| <b>(1 + NBS) TS</b><br><i><math>\beta</math>-C-Py</i> | -4399.301617 | 0.321051    | -4399.040626          | -4399.333143                 | -4399.341402                |
| <b>(1 + NBS) TS</b><br><i><math>\alpha</math>-C-T</i> | -4399.299774 | 0.321017    | -4399.039436          | -4399.333497                 | -4399.342979                |
| <b>3</b>                                              | -4038.724115 | 0.229561    | -4038.544025          | -4038.732592                 | -4038.731254                |
| <b>9</b>                                              | -4038.721518 | 0.229843    | -4038.54068           | -4038.729139                 | -4038.731254                |
| <b>(3 + NBS) TS</b><br><i><math>\beta</math>-C-Py</i> | -6970.400813 | 0.310789    | -6970.15279           | -6970.431982                 | -6970.440547                |
| <b>(3 + NBS) TS</b><br><i><math>\alpha</math>-C-T</i> | -6970.396553 | 0.310393    | -6970.150995          | -6970.429577                 | -6970.439050                |
| <b>2</b>                                              | -6609.824793 | 0.218957    | -6609.658635          | -6609.833611                 | -6609.836085                |
| <b>10</b>                                             | -6609.823204 | 0.219549    | -6609.656509          | -6609.831387                 | -6609.833647                |
| <b>NBS</b>                                            | -2931.731440 | 0.081351    | -2931.683972          | -2931.740425                 | -2931.742759                |
| <b>NHS</b>                                            | -360.6667847 | 0.092423    | -360.604652           | -360.675759                  | -360.677887                 |

<sup>a</sup> the energy values are taken from the single point calculation in acetic acid and DMF solvents with the Polarized Continuum Model (PCM) using optimized geometries of gas phase calculations.

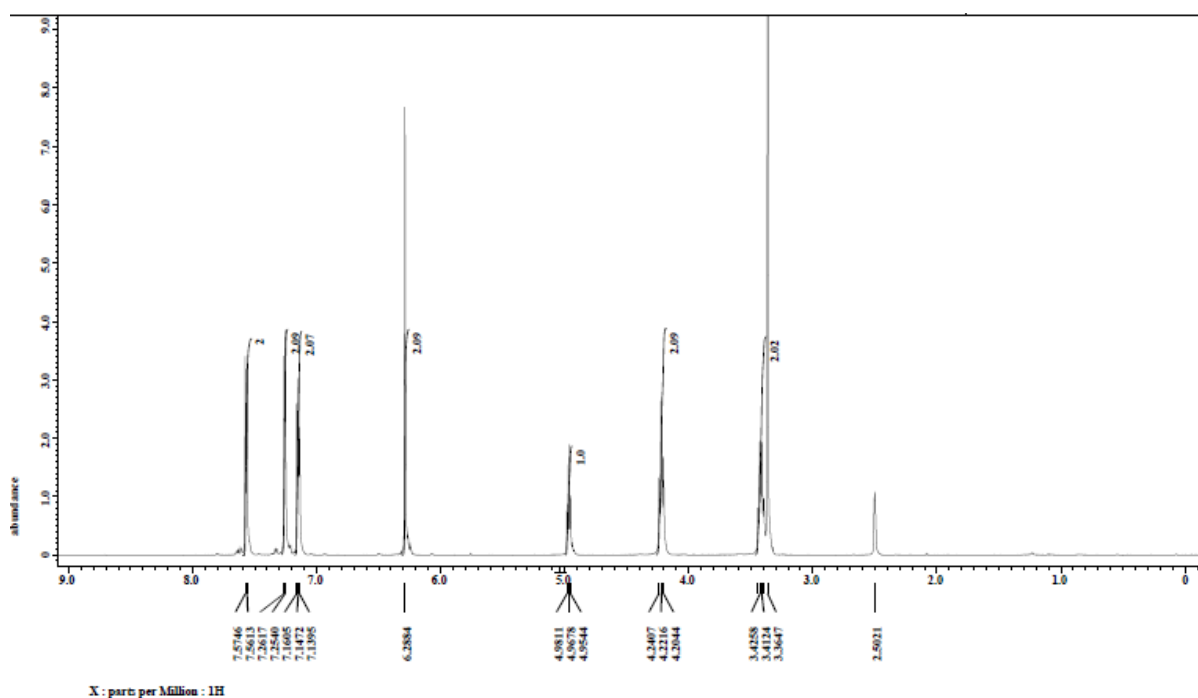

Fig. S5  $^1\text{H}$  NMR spectra of **1**

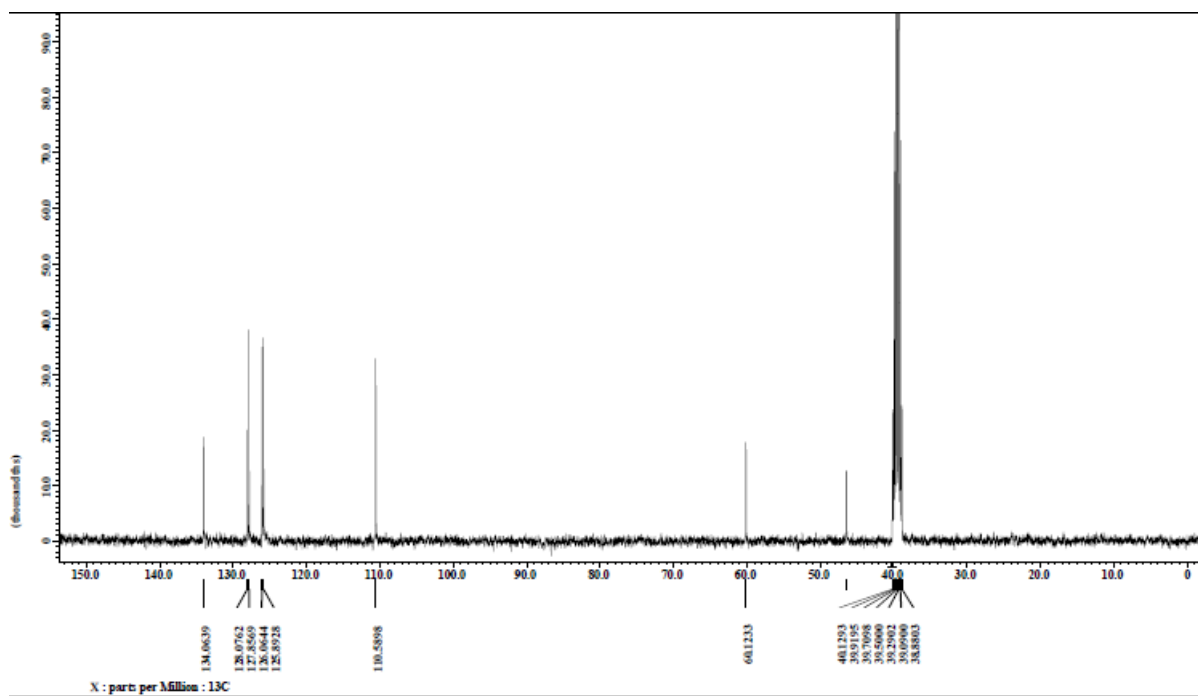

Fig. S6.  $^{13}\text{C}$  NMR spectra of **1**

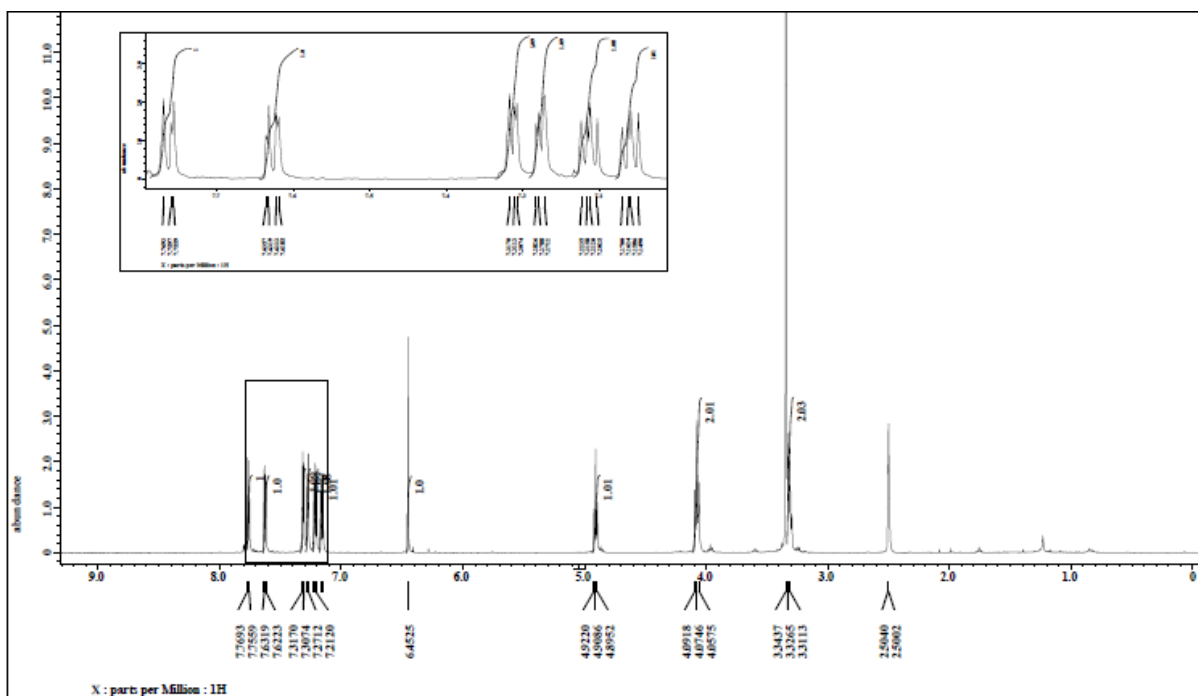

Fig. S7.  $^1\text{H}$  NMR spectra of **3**

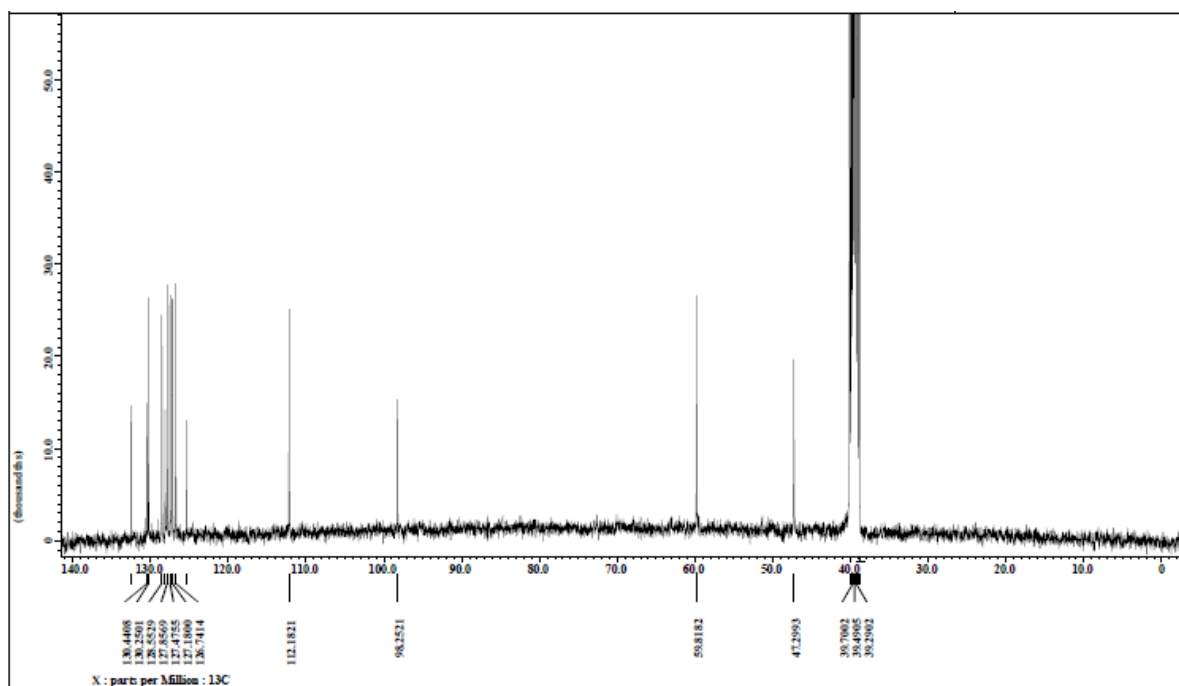

Fig. S8.  $^{13}\text{C}$  NMR spectra of **3**

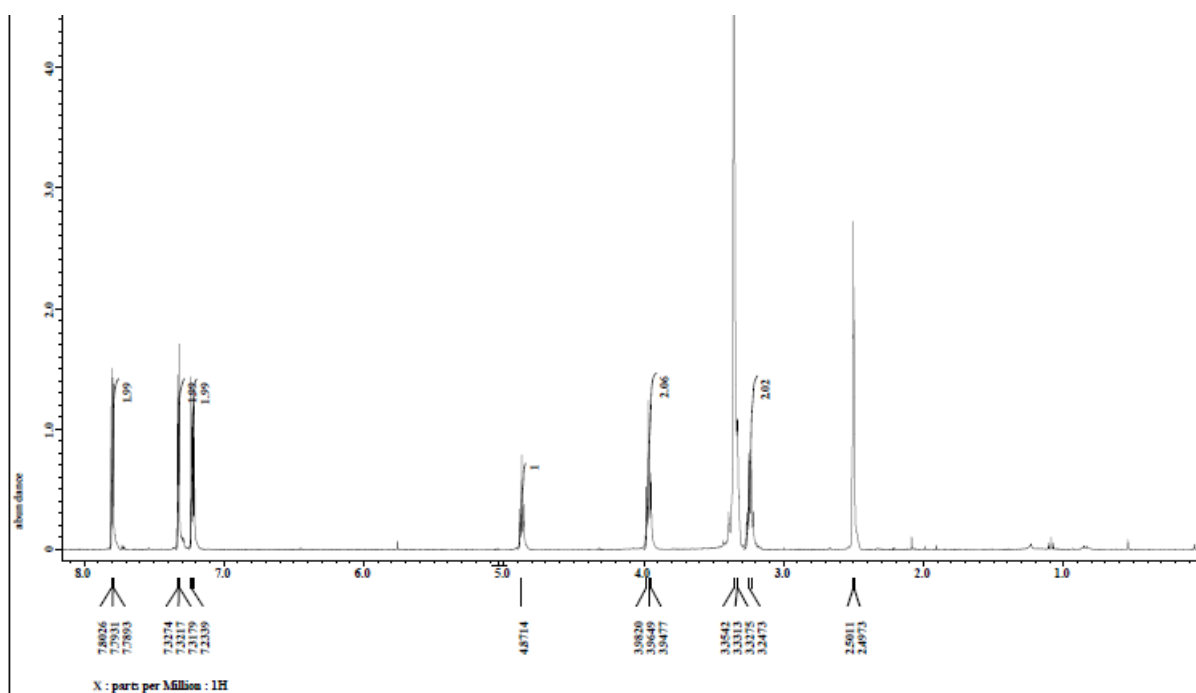

Fig. S9.  $^1\text{H}$  NMR spectra of 2

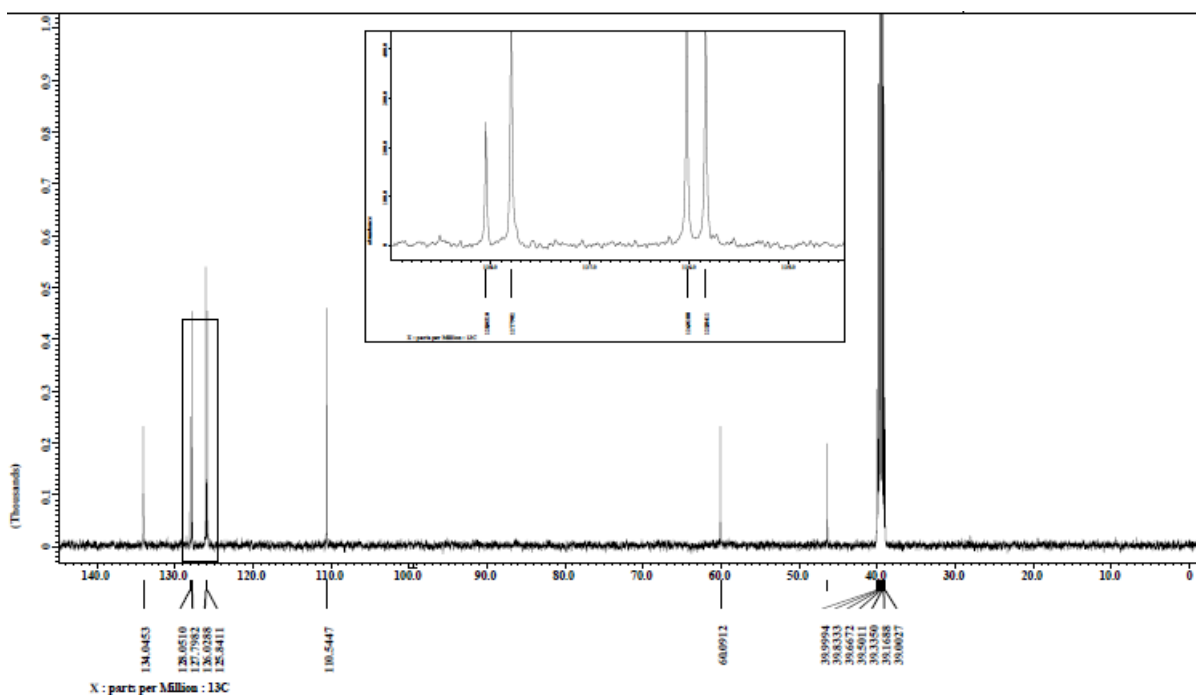

Fig. S10.  $^{13}\text{C}$  NMR spectra of 2

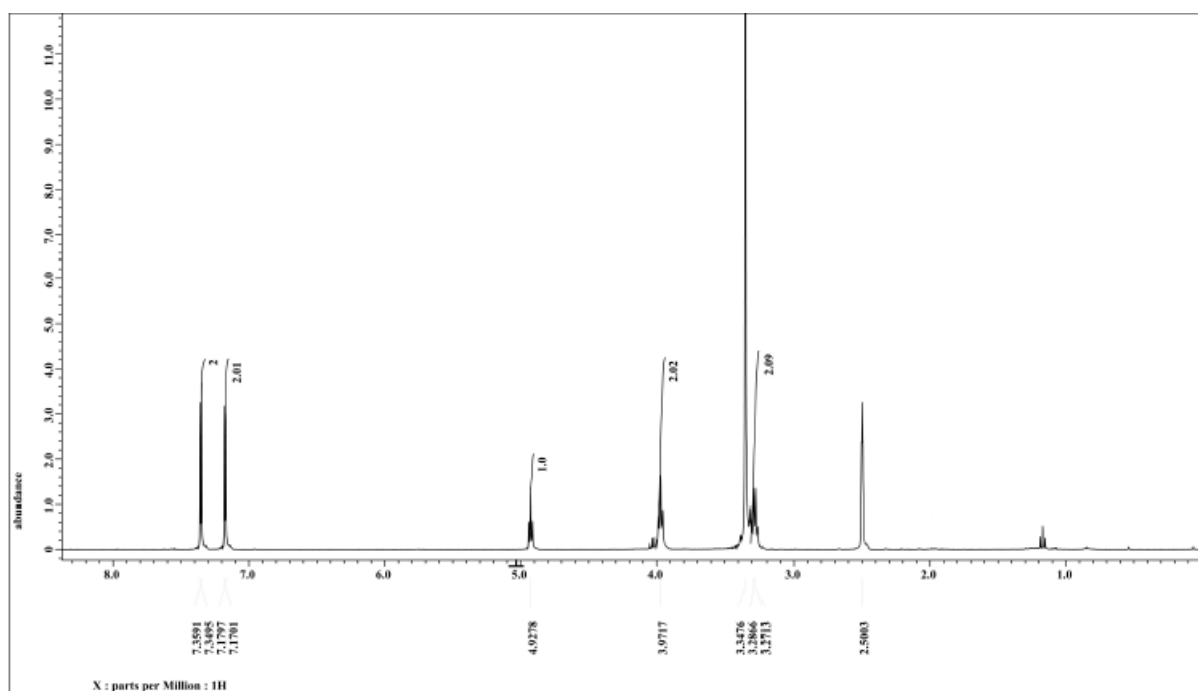

**Fig. S11.**  $^1\text{H}$  NMR spectra of 4

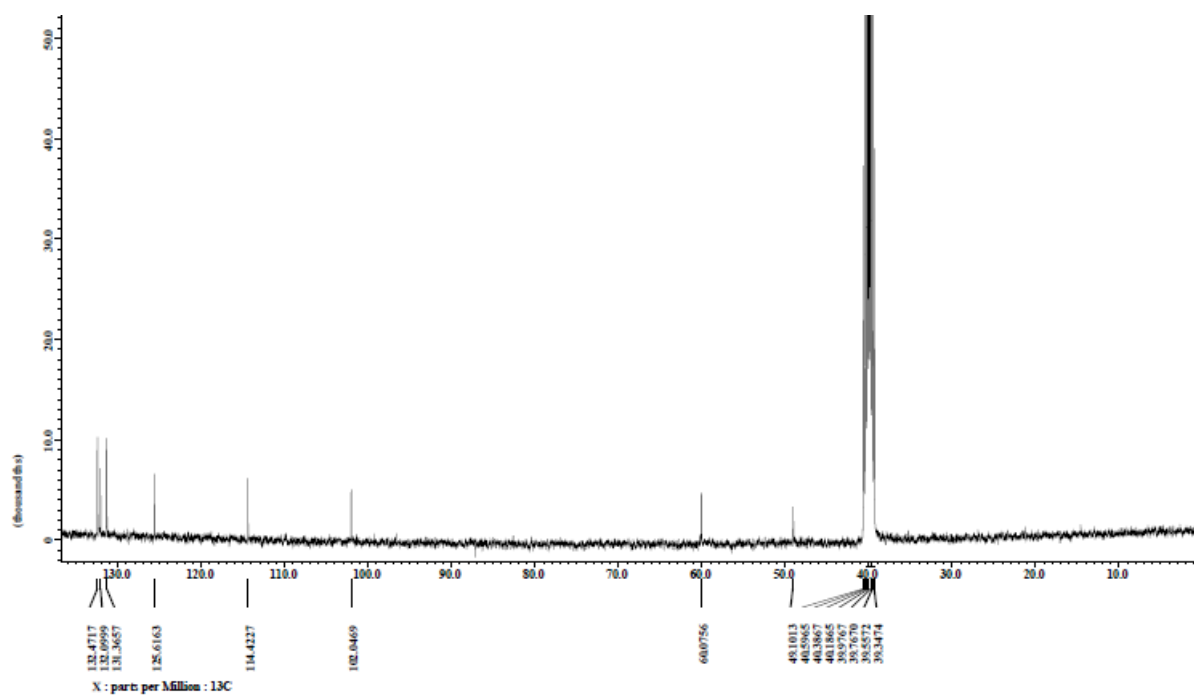

**Fig. S12.**  $^{13}\text{C}$  NMR spectra of 4



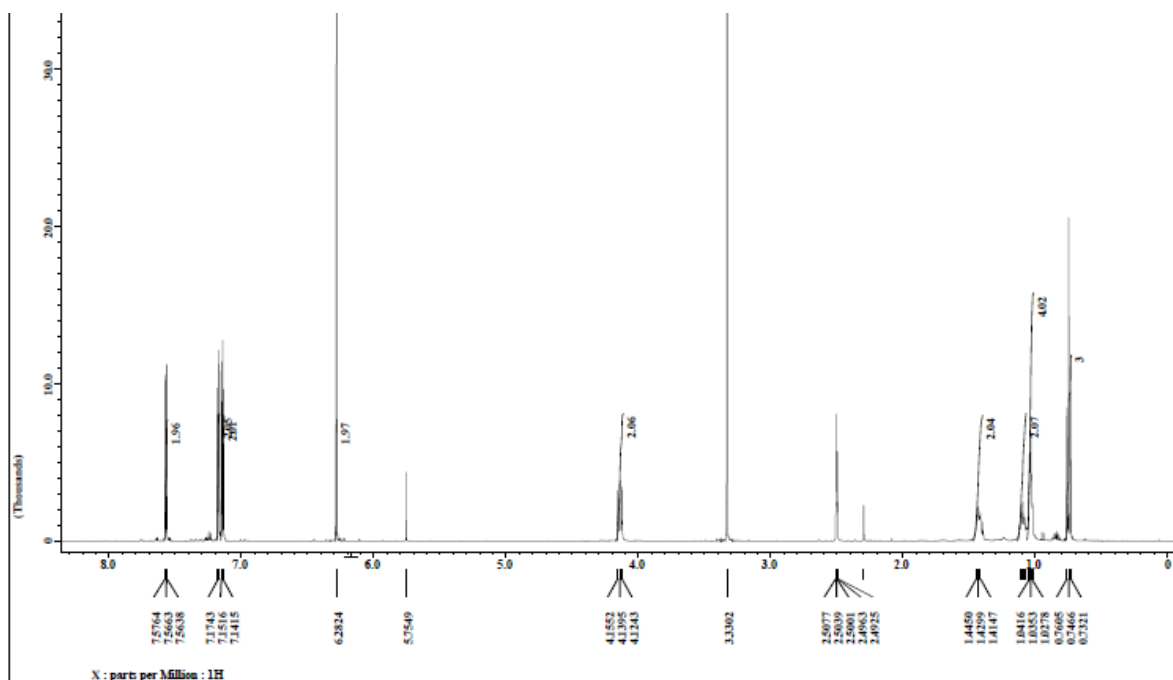

Fig. S13.  $^1\text{H}$  NMR spectra of **5**

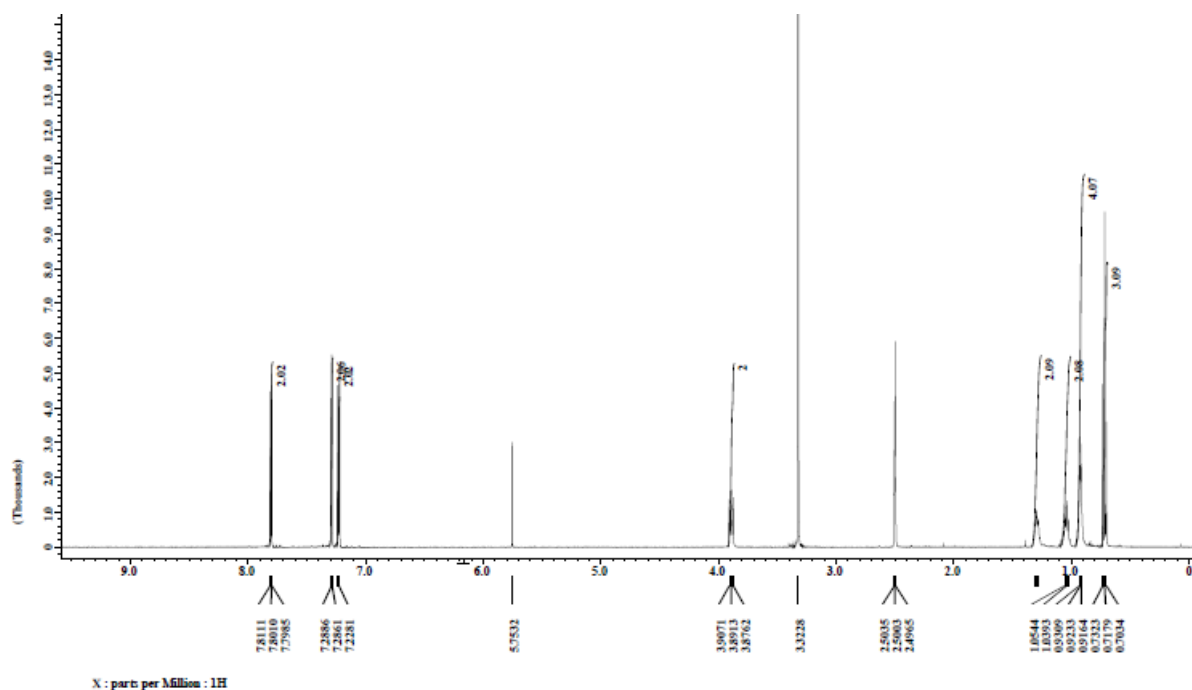

Fig. S14.  $^1\text{H}$  NMR spectra of **6**

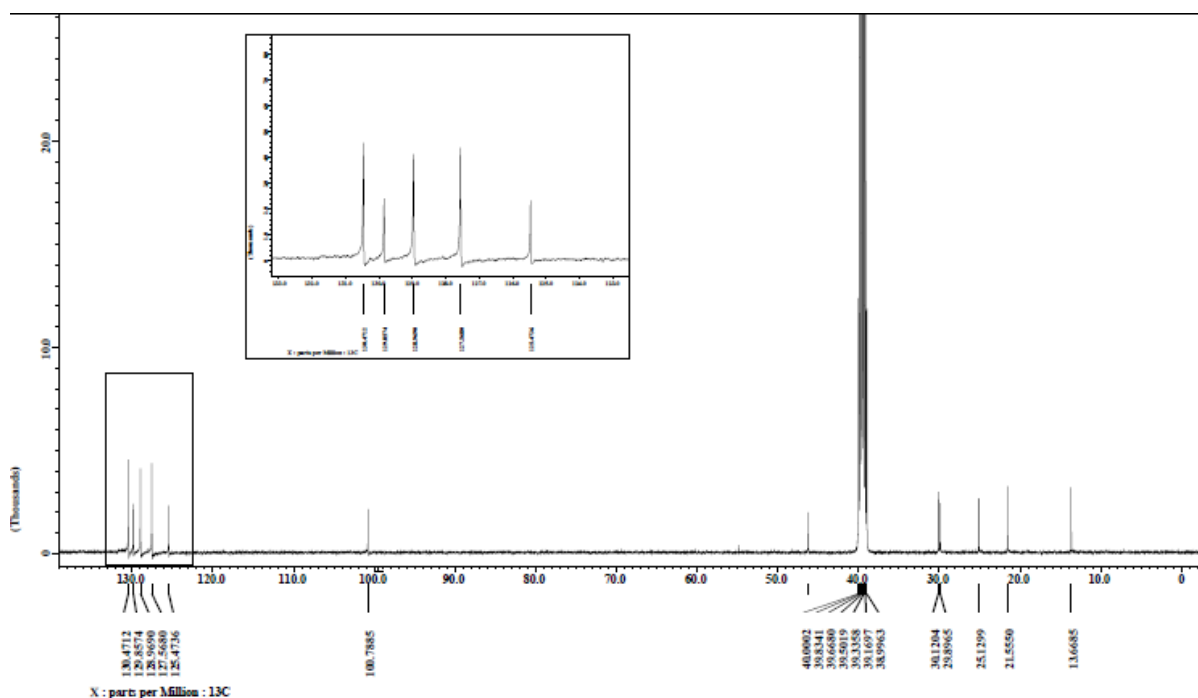

**Fig. S15.**  $^{13}\text{C}$  NMR spectra of **6**

Coordinates of optimized geometries at B3LYP/6-31G(d)

**1**

| Center Number | Atomic Number | Atomic Type | Coordinates (Angstroms) |           |           |
|---------------|---------------|-------------|-------------------------|-----------|-----------|
|               |               |             | X                       | Y         | Z         |
| 1             | 6             | 0           | 5.017239                | -0.250141 | -0.431565 |
| 2             | 6             | 0           | 4.582730                | 0.951666  | 0.054583  |
| 3             | 6             | 0           | 3.192978                | 0.953836  | 0.371184  |
| 4             | 6             | 0           | 2.563601                | -0.247451 | 0.120846  |
| 5             | 16            | 0           | 3.721934                | -1.397525 | -0.534841 |
| 6             | 1             | 0           | 6.018079                | -0.530514 | -0.731435 |
| 7             | 1             | 0           | 5.232071                | 1.808289  | 0.201139  |
| 8             | 1             | 0           | 2.690460                | 1.805919  | 0.812549  |
| 9             | 6             | 0           | 1.193507                | -0.693044 | 0.324010  |
| 10            | 6             | 0           | 0.768692                | -1.942230 | 0.761892  |
| 11            | 7             | 0           | 0.058161                | 0.060298  | 0.036782  |
| 12            | 6             | 0           | -0.635678               | -1.952707 | 0.744846  |
| 13            | 1             | 0           | 1.423453                | -2.738918 | 1.087330  |
| 14            | 6             | 0           | -1.074317               | -0.712639 | 0.286483  |
| 15            | 1             | 0           | -1.279910               | -2.764588 | 1.053679  |
| 16            | 6             | 0           | -2.449800               | -0.309528 | 0.033619  |
| 17            | 6             | 0           | -3.075605               | 0.917245  | -0.093452 |
| 18            | 16            | 0           | -3.640228               | -1.596951 | -0.156407 |
| 19            | 6             | 0           | -4.480435               | 0.823557  | -0.319687 |
| 20            | 1             | 0           | -2.573408               | 1.873110  | -0.024874 |
| 21            | 6             | 0           | -4.934498               | -0.463374 | -0.366874 |
| 22            | 1             | 0           | -5.122569               | 1.690346  | -0.435016 |
| 23            | 1             | 0           | -5.945835               | -0.816877 | -0.515926 |
| 24            | 6             | 0           | 0.047707                | 1.409913  | -0.506244 |
| 25            | 1             | 0           | -0.769647               | 1.491284  | -1.226674 |
| 26            | 1             | 0           | 0.982711                | 1.576304  | -1.044437 |
| 27            | 6             | 0           | -0.149955               | 2.479714  | 0.576797  |
| 28            | 1             | 0           | 0.794451                | 2.676363  | 1.105211  |
| 29            | 1             | 0           | -0.871699               | 2.116061  | 1.322240  |
| 30            | 8             | 0           | -0.622568               | 3.644969  | -0.088305 |
| 31            | 1             | 0           | -0.709028               | 4.354103  | 0.566516  |

(1 + NBS) TS  $\beta$ -C-Py

| Center Number | Atomic Number | Atomic Type | Coordinates (Angstroms) |           |           |
|---------------|---------------|-------------|-------------------------|-----------|-----------|
|               |               |             | X                       | Y         | Z         |
| 1             | 6             | 0           | 1.586863                | 3.957442  | -0.684066 |
| 2             | 6             | 0           | 0.374811                | 4.421305  | -0.220495 |
| 3             | 6             | 0           | -0.573748               | 3.392450  | -0.063332 |
| 4             | 6             | 0           | -0.083226               | 2.130715  | -0.420405 |
| 5             | 16            | 0           | 1.604391                | 2.261710  | -0.923273 |
| 6             | 1             | 0           | 2.480919                | 4.534201  | -0.883633 |
| 7             | 1             | 0           | 0.176556                | 5.461890  | 0.009054  |
| 8             | 1             | 0           | -1.561538               | 3.582678  | 0.334103  |
| 9             | 6             | 0           | -0.680018               | 0.831966  | -0.421066 |
| 10            | 6             | 0           | 0.066899                | -0.438494 | -0.617500 |
| 11            | 7             | 0           | -1.988411               | 0.523462  | -0.285519 |
| 12            | 6             | 0           | -0.976550               | -1.474182 | -0.605541 |
| 13            | 6             | 0           | -2.178024               | -0.896749 | -0.390171 |
| 14            | 1             | 0           | -0.790371               | -2.528435 | -0.747587 |
| 15            | 6             | 0           | -3.475087               | -1.548707 | -0.224469 |
| 16            | 6             | 0           | -3.787456               | -2.498461 | 0.720349  |
| 17            | 16            | 0           | -4.815288               | -1.336695 | -1.342421 |
| 18            | 6             | 0           | -5.096399               | -3.040838 | 0.569645  |
| 19            | 1             | 0           | -3.092446               | -2.789677 | 1.500409  |
| 20            | 6             | 0           | -5.770919               | -2.505167 | -0.492697 |
| 21            | 1             | 0           | -5.517514               | -3.793037 | 1.227183  |
| 22            | 1             | 0           | -6.775008               | -2.725506 | -0.830223 |
| 23            | 6             | 0           | -3.053618               | 1.459183  | 0.061789  |
| 24            | 1             | 0           | -4.006120               | 1.022282  | -0.234586 |
| 25            | 1             | 0           | -2.918547               | 2.372104  | -0.521706 |
| 26            | 6             | 0           | -3.064836               | 1.797092  | 1.559133  |
| 27            | 1             | 0           | -2.034350               | 1.894306  | 1.930183  |
| 28            | 1             | 0           | -3.547322               | 0.982860  | 2.118603  |
| 29            | 8             | 0           | -3.782274               | 3.017747  | 1.667329  |
| 30            | 1             | 0           | -3.880153               | 3.233821  | 2.607189  |
| 31            | 1             | 0           | 0.864678                | -0.483214 | -1.374487 |
| 32            | 35            | 0           | 1.232489                | -0.662288 | 1.025923  |
| 33            | 7             | 0           | 3.950477                | -1.099191 | 0.469288  |
| 34            | 6             | 0           | 6.176756                | -1.559083 | -0.317744 |
| 35            | 6             | 0           | 5.269126                | -1.288770 | -1.518889 |
| 36            | 6             | 0           | 5.225679                | -1.409745 | 0.896736  |
| 37            | 6             | 0           | 3.888805                | -1.014148 | -0.876450 |
| 38            | 8             | 0           | 5.587682                | -1.551760 | 2.055002  |
| 39            | 8             | 0           | 2.900571                | -0.751600 | -1.591640 |
| 40            | 1             | 0           | 5.564281                | -0.419546 | -2.117654 |
| 41            | 1             | 0           | 5.177601                | -2.133606 | -2.210836 |
| 42            | 1             | 0           | 7.004189                | -0.848439 | -0.214952 |
| 43            | 1             | 0           | 6.615757                | -2.562690 | -0.308126 |

(1 + NBS) TS  $\alpha$ -C-T

| Center Number | Atomic Number | Atomic Type | Coordinates (Angstroms) |           |           |
|---------------|---------------|-------------|-------------------------|-----------|-----------|
|               |               |             | X                       | Y         | Z         |
| 1             | 6             | 0           | -1.964705               | 0.412643  | 0.658360  |
| 2             | 6             | 0           | -1.159158               | 1.630635  | 0.659742  |
| 3             | 6             | 0           | 0.183552                | 1.453754  | 0.457930  |
| 4             | 6             | 0           | 0.577241                | 0.095302  | 0.297440  |
| 5             | 16            | 0           | -0.807626               | -0.965583 | 0.460070  |
| 6             | 1             | 0           | -1.642086               | 2.594876  | 0.769798  |
| 7             | 1             | 0           | 0.866454                | 2.284235  | 0.352167  |
| 8             | 6             | 0           | 1.839592                | -0.480233 | 0.006894  |
| 9             | 6             | 0           | 2.060235                | -1.784948 | -0.482168 |
| 10            | 7             | 0           | 3.102388                | 0.113665  | 0.164468  |
| 11            | 6             | 0           | 3.424414                | -1.973782 | -0.621537 |
| 12            | 6             | 0           | 4.073876                | -0.795327 | -0.205000 |
| 13            | 1             | 0           | 3.921905                | -2.850751 | -1.010942 |
| 14            | 6             | 0           | 5.507112                | -0.598782 | -0.117243 |
| 15            | 6             | 0           | 6.311560                | 0.530431  | -0.101795 |
| 16            | 16            | 0           | 6.513252                | -2.043689 | -0.038717 |
| 17            | 6             | 0           | 7.700255                | 0.236748  | -0.038427 |
| 18            | 1             | 0           | 5.946660                | 1.547439  | -0.155583 |
| 19            | 6             | 0           | 7.962872                | -1.106329 | -0.004651 |

|    |    |   |           |           |           |
|----|----|---|-----------|-----------|-----------|
| 20 | 1  | 0 | 8.470981  | 0.999113  | -0.026365 |
| 21 | 1  | 0 | 8.923978  | -1.600610 | 0.044149  |
| 22 | 6  | 0 | 3.385639  | 1.425529  | 0.738839  |
| 23 | 1  | 0 | 4.324305  | 1.354755  | 1.292021  |
| 24 | 1  | 0 | 2.603296  | 1.662884  | 1.463988  |
| 25 | 6  | 0 | 3.534177  | 2.532541  | -0.326656 |
| 26 | 1  | 0 | 2.556525  | 2.846265  | -0.719115 |
| 27 | 1  | 0 | 4.101075  | 2.140868  | -1.175532 |
| 28 | 8  | 0 | 4.279234  | 3.629378  | 0.172562  |
| 29 | 1  | 0 | 3.733957  | 4.117126  | 0.809126  |
| 30 | 35 | 0 | -3.229396 | 0.611918  | -0.906239 |
| 31 | 7  | 0 | -5.839580 | -0.168380 | -0.339975 |
| 32 | 6  | 0 | -8.002988 | -0.866391 | 0.430614  |
| 33 | 6  | 0 | -7.019446 | -0.898388 | 1.603523  |
| 34 | 6  | 0 | -7.138688 | -0.380891 | -0.759520 |
| 35 | 6  | 0 | -5.683258 | -0.436166 | 0.974817  |
| 36 | 8  | 0 | -7.574583 | -0.221014 | -1.887843 |
| 37 | 8  | 0 | -4.654030 | -0.353661 | 1.667953  |
| 38 | 1  | 0 | -7.277884 | -0.218899 | 2.423204  |
| 39 | 1  | 0 | -6.878622 | -1.891291 | 2.044578  |
| 40 | 1  | 0 | -8.840454 | -0.174468 | 0.570309  |
| 41 | 1  | 0 | -8.433121 | -1.843222 | 0.184564  |
| 42 | 1  | 0 | -2.715273 | 0.213862  | 1.438092  |
| 43 | 1  | 0 | 1.278826  | -2.483641 | -0.747541 |

3

| Center Number | Atomic Number | Atomic Type | Coordinates (Angstroms) |           |           |
|---------------|---------------|-------------|-------------------------|-----------|-----------|
|               |               |             | X                       | Y         | Z         |
| 1             | 6             | 0           | -5.261915               | -0.672484 | 0.450118  |
| 2             | 6             | 0           | -5.020509               | 0.604854  | 0.029595  |
| 3             | 6             | 0           | -3.638055               | 0.867647  | -0.199577 |
| 4             | 6             | 0           | -2.820848               | -0.217462 | 0.050800  |
| 5             | 16            | 0           | -3.792423               | -1.578939 | 0.598351  |
| 6             | 1             | 0           | -6.210518               | -1.135918 | 0.685602  |
| 7             | 1             | 0           | -5.800724               | 1.342693  | -0.123771 |
| 8             | 1             | 0           | -3.284216               | 1.829701  | -0.547985 |
| 9             | 6             | 0           | -1.384074               | -0.417799 | -0.070728 |
| 10            | 6             | 0           | -0.719132               | -1.623397 | -0.274140 |
| 11            | 7             | 0           | -0.422993               | 0.576747  | 0.058036  |
| 12            | 6             | 0           | 0.657846                | -1.345931 | -0.259463 |
| 13            | 1             | 0           | -1.181586               | -2.585422 | -0.439319 |
| 14            | 6             | 0           | 0.844837                | 0.014255  | -0.062000 |
| 15            | 6             | 0           | 2.083135                | 0.780265  | 0.052669  |
| 16            | 6             | 0           | 2.629065                | 1.697143  | -0.816357 |
| 17            | 16            | 0           | 3.132676                | 0.574521  | 1.445935  |
| 18            | 6             | 0           | 3.871696                | 2.236743  | -0.373766 |
| 19            | 1             | 0           | 2.165473                | 1.949349  | -1.763995 |
| 20            | 6             | 0           | 4.271307                | 1.721313  | 0.829504  |
| 21            | 1             | 0           | 4.448186                | 2.964174  | -0.934937 |
| 22            | 1             | 0           | 5.174833                | 1.941932  | 1.382619  |
| 23            | 6             | 0           | -0.679909               | 1.980617  | 0.351965  |
| 24            | 1             | 0           | 0.143297                | 2.363478  | 0.958643  |
| 25            | 1             | 0           | -1.594708               | 2.046998  | 0.944608  |
| 26            | 6             | 0           | -0.852739               | 2.831713  | -0.912653 |
| 27            | 1             | 0           | -1.388001               | 2.248055  | -1.676879 |
| 28            | 1             | 0           | 0.130873                | 3.098698  | -1.323905 |
| 29            | 8             | 0           | -1.587252               | 3.985825  | -0.523360 |
| 30            | 1             | 0           | -1.612801               | 4.597154  | -1.274694 |
| 31            | 35            | 0           | 2.038302                | -2.607397 | -0.502564 |

7

| Center Number | Atomic Number | Atomic Type | Coordinates (Angstroms) |           |          |
|---------------|---------------|-------------|-------------------------|-----------|----------|
|               |               |             | X                       | Y         | Z        |
| 1             | 6             | 0           | 3.718944                | 0.116121  | 0.002094 |
| 2             | 6             | 0           | 3.193732                | 1.307138  | 0.415685 |
| 3             | 6             | 0           | 1.788060                | 1.225777  | 0.637523 |
| 4             | 6             | 0           | 1.247436                | -0.018012 | 0.390421 |

|    |    |   |           |           |           |
|----|----|---|-----------|-----------|-----------|
| 5  | 16 | 0 | 2.510051  | -1.123160 | -0.150696 |
| 6  | 1  | 0 | 3.787112  | 2.199775  | 0.573601  |
| 7  | 1  | 0 | 1.209522  | 2.060571  | 1.013778  |
| 8  | 6  | 0 | -0.102342 | -0.541913 | 0.516080  |
| 9  | 6  | 0 | -0.477354 | -1.804432 | 0.962454  |
| 10 | 7  | 0 | -1.259905 | 0.129212  | 0.129209  |
| 11 | 6  | 0 | -1.873384 | -1.905237 | 0.851560  |
| 12 | 1  | 0 | 0.200911  | -2.548379 | 1.357502  |
| 13 | 6  | 0 | -2.355456 | -0.708129 | 0.326629  |
| 14 | 1  | 0 | -2.485739 | -2.747752 | 1.142355  |
| 15 | 6  | 0 | -3.732948 | -0.400186 | -0.028834 |
| 16 | 6  | 0 | -4.424213 | 0.781821  | -0.222461 |
| 17 | 16 | 0 | -4.822291 | -1.764400 | -0.275138 |
| 18 | 6  | 0 | -5.800645 | 0.594279  | -0.543581 |
| 19 | 1  | 0 | -3.989566 | 1.769026  | -0.137345 |
| 20 | 6  | 0 | -6.167329 | -0.720191 | -0.597184 |
| 21 | 1  | 0 | -6.486897 | 1.415663  | -0.720283 |
| 22 | 1  | 0 | -7.140964 | -1.140664 | -0.809885 |
| 23 | 6  | 0 | -1.317313 | 1.460090  | -0.455930 |
| 24 | 1  | 0 | -2.094569 | 1.470888  | -1.223476 |
| 25 | 1  | 0 | -0.363998 | 1.667667  | -0.945746 |
| 26 | 6  | 0 | -1.642389 | 2.546178  | 0.579140  |
| 27 | 1  | 0 | -0.744542 | 2.817647  | 1.153898  |
| 28 | 1  | 0 | -2.382343 | 2.158967  | 1.294531  |
| 29 | 8  | 0 | -2.145707 | 3.659109  | -0.148959 |
| 30 | 1  | 0 | -2.310613 | 4.381574  | 0.475546  |
| 31 | 35 | 0 | 5.527249  | -0.259463 | -0.373586 |

(3 + NBS) TS  $\beta$ -C-Py

| Center Number | Atomic Number | Atomic Type | Coordinates (Angstroms) |           |           |
|---------------|---------------|-------------|-------------------------|-----------|-----------|
|               |               |             | X                       | Y         | Z         |
| 1             | 6             | 0           | 1.821022                | 4.253727  | -0.973337 |
| 2             | 6             | 0           | 0.643629                | 4.796527  | -0.507219 |
| 3             | 6             | 0           | -0.334005               | 3.818734  | -0.238726 |
| 4             | 6             | 0           | 0.099478                | 2.516291  | -0.512862 |
| 5             | 16            | 0           | 1.771431                | 2.544423  | -1.079592 |
| 6             | 1             | 0           | 2.726515                | 4.779450  | -1.248116 |
| 7             | 1             | 0           | 0.490008                | 5.858264  | -0.352591 |
| 8             | 1             | 0           | -1.298827               | 4.074696  | 0.178310  |
| 9             | 6             | 0           | -0.545374               | 1.246015  | -0.396233 |
| 10            | 6             | 0           | 0.155107                | -0.061941 | -0.482293 |
| 11            | 7             | 0           | -1.864275               | 1.000709  | -0.232541 |
| 12            | 6             | 0           | -0.935862               | -1.044801 | -0.383877 |
| 13            | 6             | 0           | -2.122485               | -0.409964 | -0.219426 |
| 14            | 6             | 0           | -3.445457               | -0.986960 | -0.015058 |
| 15            | 6             | 0           | -3.800181               | -1.863153 | 0.984427  |
| 16            | 16            | 0           | -4.769831               | -0.791159 | -1.155079 |
| 17            | 6             | 0           | -5.130944               | -2.354069 | 0.861433  |
| 18            | 1             | 0           | -3.115988               | -2.147189 | 1.776113  |
| 19            | 6             | 0           | -5.777927               | -1.858056 | -0.237296 |
| 20            | 1             | 0           | -5.586992               | -3.043697 | 1.562738  |
| 21            | 1             | 0           | -6.790465               | -2.053887 | -0.564536 |
| 22            | 6             | 0           | -2.886647               | 2.006875  | 0.041976  |
| 23            | 1             | 0           | -3.858315               | 1.594513  | -0.224937 |
| 24            | 1             | 0           | -2.707111               | 2.867083  | -0.605906 |
| 25            | 6             | 0           | -2.879709               | 2.452354  | 1.510977  |
| 26            | 1             | 0           | -1.845131               | 2.521723  | 1.877163  |
| 27            | 1             | 0           | -3.404376               | 1.707452  | 2.126239  |
| 28            | 8             | 0           | -3.531522               | 3.713662  | 1.527519  |
| 29            | 1             | 0           | -3.621511               | 4.000875  | 2.448970  |
| 30            | 1             | 0           | 0.943664                | -0.214375 | -1.237654 |
| 31            | 35            | 0           | 1.313147                | -0.186860 | 1.166095  |
| 32            | 7             | 0           | 3.991935                | -0.805193 | 0.610419  |
| 33            | 6             | 0           | 6.184555                | -1.412320 | -0.170081 |
| 34            | 6             | 0           | 5.273181                | -1.174925 | -1.375601 |
| 35            | 6             | 0           | 5.260281                | -1.138846 | 1.043063  |
| 36            | 6             | 0           | 3.915338                | -0.801124 | -0.736263 |
| 37            | 8             | 0           | 5.633055                | -1.215361 | 2.203661  |
| 38            | 8             | 0           | 2.930268                | -0.539671 | -1.457313 |
| 39            | 1             | 0           | 5.598010                | -0.356856 | -2.028582 |
| 40            | 1             | 0           | 5.134989                | -2.054547 | -2.014223 |
| 41            | 1             | 0           | 7.047698                | -0.739385 | -0.123123 |

|    |    |   |           |           |           |
|----|----|---|-----------|-----------|-----------|
| 42 | 1  | 0 | 6.573026  | -2.434257 | -0.101012 |
| 43 | 35 | 0 | -0.639513 | -2.880453 | -0.472148 |

(3 + NBS) TS  $\alpha$ -C-T

| Center Number | Atomic Number | Atomic Type | Coordinates (Angstroms) |           |           |
|---------------|---------------|-------------|-------------------------|-----------|-----------|
|               |               |             | X                       | Y         | Z         |
| 1             | 6             | 0           | -2.569283               | 0.645293  | 0.676727  |
| 2             | 6             | 0           | -1.867551               | 1.924283  | 0.690601  |
| 3             | 6             | 0           | -0.510265               | 1.858763  | 0.519041  |
| 4             | 6             | 0           | 0.001014                | 0.538348  | 0.374244  |
| 5             | 16            | 0           | -1.299389               | -0.631111 | 0.492455  |
| 6             | 1             | 0           | -2.427984               | 2.845479  | 0.801799  |
| 7             | 1             | 0           | 0.101396                | 2.745738  | 0.460627  |
| 8             | 6             | 0           | 1.319560                | 0.055322  | 0.152438  |
| 9             | 6             | 0           | 1.655634                | -1.285089 | -0.117537 |
| 10            | 7             | 0           | 2.522975                | 0.774712  | 0.215317  |
| 11            | 6             | 0           | 3.034695                | -1.369482 | -0.202775 |
| 12            | 6             | 0           | 3.583235                | -0.088479 | 0.007314  |
| 13            | 6             | 0           | 4.982700                | 0.300158  | 0.069733  |
| 14            | 6             | 0           | 5.631364                | 1.386232  | -0.488446 |
| 15            | 16            | 0           | 6.126012                | -0.674745 | 0.983142  |
| 16            | 6             | 0           | 7.017901                | 1.438603  | -0.186904 |
| 17            | 1             | 0           | 5.140971                | 2.112110  | -1.124948 |
| 18            | 6             | 0           | 7.424635                | 0.395436  | 0.602420  |
| 19            | 1             | 0           | 7.683317                | 2.213233  | -0.550485 |
| 20            | 1             | 0           | 8.419559                | 0.186397  | 0.973000  |
| 21            | 6             | 0           | 2.674049                | 2.197909  | 0.518786  |
| 22            | 1             | 0           | 3.678306                | 2.350132  | 0.916401  |
| 23            | 1             | 0           | 1.968792                | 2.461213  | 1.311747  |
| 24            | 6             | 0           | 2.498583                | 3.108131  | -0.712637 |
| 25            | 1             | 0           | 1.485675                | 3.026019  | -1.129713 |
| 26            | 1             | 0           | 3.185686                | 2.789271  | -1.501153 |
| 27            | 8             | 0           | 2.842162                | 4.444566  | -0.396043 |
| 28            | 1             | 0           | 2.103646                | 4.854910  | 0.079380  |
| 29            | 35            | 0           | -3.818977               | 0.738447  | -0.905938 |
| 30            | 7             | 0           | -6.359222               | -0.271374 | -0.290929 |
| 31            | 6             | 0           | -8.449994               | -1.138638 | 0.509037  |
| 32            | 6             | 0           | -7.453895               | -1.079647 | 1.670557  |
| 33            | 6             | 0           | -7.640427               | -0.598504 | -0.695334 |
| 34            | 6             | 0           | -6.169512               | -0.508728 | 1.023568  |
| 35            | 8             | 0           | -8.097041               | -0.489827 | -1.821005 |
| 36            | 8             | 0           | -5.146406               | -0.329305 | 1.708984  |
| 37            | 1             | 0           | -7.759557               | -0.421119 | 2.490952  |
| 38            | 1             | 0           | -7.222835               | -2.054860 | 2.112940  |
| 39            | 1             | 0           | -9.337456               | -0.513030 | 0.652488  |
| 40            | 1             | 0           | -8.804839               | -2.148718 | 0.278040  |
| 41            | 1             | 0           | -3.314236               | 0.383702  | 1.446083  |
| 42            | 1             | 0           | 0.956843                | -2.096822 | -0.258668 |
| 43            | 35            | 0           | 3.990579                | -2.939769 | -0.592326 |

2

| Center Number | Atomic Number | Atomic Type | Coordinates (Angstroms) |           |           |
|---------------|---------------|-------------|-------------------------|-----------|-----------|
|               |               |             | X                       | Y         | Z         |
| 1             | 6             | 0           | 4.768812                | 1.653715  | -0.634317 |
| 2             | 6             | 0           | 4.288174                | 2.340186  | 0.447697  |
| 3             | 6             | 0           | 2.962799                | 1.953681  | 0.797592  |
| 4             | 6             | 0           | 2.437138                | 0.978843  | -0.021236 |
| 5             | 16            | 0           | 3.607602                | 0.529593  | -1.249861 |
| 6             | 1             | 0           | 5.743633                | 1.733533  | -1.097129 |
| 7             | 1             | 0           | 4.860567                | 3.086535  | 0.987509  |
| 8             | 1             | 0           | 2.421192                | 2.366098  | 1.641834  |
| 9             | 6             | 0           | 1.122398                | 0.345619  | 0.016129  |
| 10            | 6             | 0           | 0.799260                | -1.002363 | 0.105690  |
| 11            | 7             | 0           | -0.076849               | 1.044538  | -0.073480 |
| 12            | 6             | 0           | -0.604208               | -1.119823 | 0.083525  |
| 13            | 6             | 0           | -1.143372               | 0.155885  | -0.030064 |
| 14            | 6             | 0           | -2.551122               | 0.533894  | -0.090161 |

|    |    |   |           |           |           |
|----|----|---|-----------|-----------|-----------|
| 15 | 6  | 0 | -3.543472 | 0.152178  | 0.783312  |
| 16 | 16 | 0 | -3.247825 | 1.429107  | -1.435946 |
| 17 | 6  | 0 | -4.843595 | 0.592073  | 0.401333  |
| 18 | 1  | 0 | -3.337427 | -0.434808 | 1.671002  |
| 19 | 6  | 0 | -4.840808 | 1.302711  | -0.767225 |
| 20 | 1  | 0 | -5.740287 | 0.394914  | 0.978677  |
| 21 | 1  | 0 | -5.676729 | 1.768029  | -1.272473 |
| 22 | 6  | 0 | -0.196267 | 2.501175  | -0.113012 |
| 23 | 1  | 0 | -0.920470 | 2.791712  | -0.876368 |
| 24 | 1  | 0 | 0.773727  | 2.909857  | -0.398569 |
| 25 | 6  | 0 | -0.616945 | 3.092623  | 1.233945  |
| 26 | 1  | 0 | 0.078728  | 2.753959  | 2.018549  |
| 27 | 1  | 0 | -1.620929 | 2.732691  | 1.499674  |
| 28 | 8  | 0 | -0.584502 | 4.502907  | 1.070655  |
| 29 | 1  | 0 | -0.986162 | 4.907108  | 1.853763  |
| 30 | 35 | 0 | -1.564998 | -2.730692 | 0.163915  |
| 31 | 35 | 0 | 2.011538  | -2.428343 | 0.254265  |

## 8

| Center Number | Atomic Number | Atomic Type | Coordinates (Angstroms) |           |           |
|---------------|---------------|-------------|-------------------------|-----------|-----------|
|               |               |             | X                       | Y         | Z         |
| 1             | 6             | 0           | -4.171651               | 0.133658  | 0.051087  |
| 2             | 6             | 0           | -3.742576               | 1.376519  | -0.314830 |
| 3             | 6             | 0           | -2.324610               | 1.441830  | -0.448536 |
| 4             | 6             | 0           | -1.680088               | 0.250048  | -0.182292 |
| 5             | 16            | 0           | -2.857794               | -0.983731 | 0.265210  |
| 6             | 1             | 0           | -4.409204               | 2.212015  | -0.491836 |
| 7             | 1             | 0           | -1.822114               | 2.354320  | -0.743846 |
| 8             | 6             | 0           | -0.280539               | -0.143599 | -0.220436 |
| 9             | 6             | 0           | 0.225676                | -1.425274 | -0.418490 |
| 10            | 7             | 0           | 0.796070                | 0.706810  | -0.004396 |
| 11            | 6             | 0           | 1.623881                | -1.339069 | -0.315198 |
| 12            | 1             | 0           | -0.351075               | -2.311305 | -0.640936 |
| 13            | 6             | 0           | 1.979851                | -0.021316 | -0.067468 |
| 14            | 6             | 0           | 3.301803                | 0.567833  | 0.132008  |
| 15            | 6             | 0           | 4.027046                | 1.385486  | -0.703855 |
| 16            | 16            | 0           | 4.217285                | 0.236682  | 1.593314  |
| 17            | 6             | 0           | 5.301584                | 1.751600  | -0.181942 |
| 18            | 1             | 0           | 3.666822                | 1.685227  | -1.682106 |
| 19            | 6             | 0           | 5.544266                | 1.203538  | 1.048613  |
| 20            | 1             | 0           | 6.010643                | 2.382465  | -0.706886 |
| 21            | 1             | 0           | 6.430630                | 1.304671  | 1.661041  |
| 22            | 6             | 0           | 0.714568                | 2.126918  | 0.311740  |
| 23            | 1             | 0           | 1.541163                | 2.380804  | 0.978468  |
| 24            | 1             | 0           | -0.218512               | 2.307015  | 0.849805  |
| 25            | 6             | 0           | 0.739979                | 3.016716  | -0.938163 |
| 26            | 1             | 0           | 0.196497                | 2.516964  | -1.754515 |
| 27            | 1             | 0           | 1.776344                | 3.168928  | -1.270702 |
| 28            | 8             | 0           | 0.122317                | 4.243963  | -0.570638 |
| 29            | 1             | 0           | 0.231851                | 4.870769  | -1.301471 |
| 30            | 35            | 0           | 2.836875                | -2.767876 | -0.513491 |
| 31            | 35            | 0           | -5.948620               | -0.425490 | 0.326321  |

## NBS

| Center Number | Atomic Number | Atomic Type | Coordinates (Angstroms) |           |           |
|---------------|---------------|-------------|-------------------------|-----------|-----------|
|               |               |             | X                       | Y         | Z         |
| 1             | 6             | 0           | -0.912490               | -1.190560 | 0.000002  |
| 2             | 6             | 0           | -2.380765               | -0.769869 | -0.000523 |
| 3             | 1             | 0           | -2.863626               | -1.203827 | -0.881396 |
| 4             | 1             | 0           | -2.864871               | -1.205163 | 0.878988  |
| 5             | 6             | 0           | -2.380697               | 0.770062  | 0.000533  |
| 6             | 1             | 0           | -2.863484               | 1.203998  | 0.881477  |
| 7             | 1             | 0           | -2.864833               | 1.205494  | -0.878888 |

|    |    |   |           |           |           |
|----|----|---|-----------|-----------|-----------|
| 8  | 6  | 0 | -0.912408 | 1.190595  | -0.000017 |
| 9  | 7  | 0 | -0.166390 | -0.000044 | 0.000119  |
| 10 | 8  | 0 | -0.455664 | 2.306266  | -0.000291 |
| 11 | 8  | 0 | -0.455932 | -2.306319 | 0.000157  |
| 12 | 35 | 0 | 1.698071  | -0.000032 | 0.000002  |

NHS

| Center<br>Number | Atomic<br>Number | Atomic<br>Type | Coordinates (Angstroms) |           |           |
|------------------|------------------|----------------|-------------------------|-----------|-----------|
|                  |                  |                | X                       | Y         | Z         |
| 1                | 6                | 0              | -1.178322               | -0.214699 | 0.000099  |
| 2                | 6                | 0              | -0.769650               | 1.259669  | -0.000113 |
| 3                | 1                | 0              | -1.205720               | 1.743632  | -0.879503 |
| 4                | 1                | 0              | -1.205928               | 1.743864  | 0.879038  |
| 5                | 6                | 0              | 0.769683                | 1.259684  | 0.000206  |
| 6                | 1                | 0              | 1.205775                | 1.743695  | 0.879582  |
| 7                | 1                | 0              | 1.205982                | 1.743880  | -0.878929 |
| 8                | 6                | 0              | 1.178326                | -0.214677 | 0.000005  |
| 9                | 7                | 0              | -0.000020               | -0.958927 | 0.000389  |
| 10               | 8                | 0              | 2.296897                | -0.676912 | -0.000357 |
| 11               | 8                | 0              | -2.296924               | -0.676859 | -0.000259 |
| 12               | 1                | 0              | 0.000029                | -1.972277 | 0.000839  |
